## Effects of extracellular purines on ion transport across the integument of *Hirudo medicinalis*

Mikael Schnizler\*, Mirjam Buss and Wolfgang Clauss

*Institut für Tierphysiologie der Justus-Liebig-Universität Giessen, Wartweg 95, D-35392 Giessen Germany*

\*Author for correspondence (e-mail: Mikael.K.Schnizler@physzool.bio.uni-giessen.de)

Accepted 29 May 2002

### Summary

Little is known about the long-term regulation of epithelial ion transport in invertebrates and the specific mediators involved. For some years, we have been investigating the short-term regulation of transepithelial ion transport across the dorsal integument of the leech *Hirudo medicinalis*, and we have established a model of  $\text{Na}^+$  uptake. In the present study, we investigated the effect of long-term acclimation on transintegumental ion transport by adapting leeches to high-salinity conditions. We dissected segments of dorsal integument and measured ion currents in Ussing chamber experiments. Electrophysiological variables, such as transepithelial potential ( $V_T$ ) and short-circuit-current ( $I_{sc}$ ), were profoundly affected by adaptation to high-salinity conditions. The total transepithelial  $\text{Na}^+$  current ( $I_{Na}$ ) decreased from  $7.66 \pm 0.82$  to  $4.6 \pm 0.54 \mu\text{A cm}^{-2}$  in preparations adapted to high salinity. The involvement of epithelial  $\text{Na}^+$  channels was determined as current inhibition ( $I_{ami}$ ) by apical application of amiloride;  $\text{Na}^+$  channels were equally active in control epithelia and

epithelia from leeches adapted to high salinity. Removal of  $\text{Ca}^{2+}$  from the apical solutions, which is believed to reduce intracellular  $\text{Ca}^{2+}$  concentrations, equalized transepithelial variables between high-salt-adapted integuments and control integuments.

Extracellular purines regulate transepithelial  $\text{Cl}^-$  secretion and  $\text{Na}^+$  absorption. In a variety of tissues we tested ATP and adenosine for their effects on epithelial transport. Examination of integuments from pondwater- and high-salinity-adapted leeches revealed different sensitivities for these purines. Apical and basolateral application of ATP both stimulated transepithelial  $\text{Na}^+$  uptake and  $I_{ami}$ . Adenosine upregulated non- $\text{Na}^+$  currents and acted from the basolateral side only. Apical  $\text{Ca}^{2+}$ -free conditions attenuated these effects of purines on transepithelial currents. Extracellular UTP had no effect on ion transport.

Key words: leech, *Hirudo medicinalis*,  $\text{Na}^+$  transport, invertebrate, amiloride, cyclic AMP, ATP, adenosine, UTP.

### Introduction

Fresh water represents a hypo-osmotic environment to the leech, in which it has to cope with the loss of salts and uptake of water. The nephridia and the integument collaborate in accomplishing this osmoregulation. While the homeostatic mechanisms in the nephridia have been thoroughly investigated (Nieczej and Zerbst-Boroffka, 1993; Zerbst-Boroffka and Wenning, 1986; Zerbst-Boroffka et al., 1982), there is little information concerning integumental ion transport (Milde et al., 2001; Schnizler and Clauss, 1998; Weber et al., 1993, 1995). The absorption of extracellular  $\text{Na}^+$  plays a prominent role in maintaining electrolyte balance. The majority of electrogenic  $\text{Na}^+$  absorption across the leech integument is likely to be *via* mechanisms analogous to those in vertebrate tight epithelia. Recent models of ion absorption processes across frog skin from fresh water have included energization of  $\text{Na}^+$  entry *via* apical  $\text{Na}^+$  channels by electrogenic  $\text{H}^+$  V-ATPases (Ehrenfeld and Klein, 1997; Nelson and Harvey, 1999). Extracellular  $\text{Na}^+$  crosses the apical

cell membrane through highly selective  $\text{Na}^+$  channels along an electrochemical gradient that is sustained by the basolateral  $\text{Na}^+/\text{K}^+$ -ATPases. It remains to be determined whether apical  $\text{Na}^+$  entry is driven by  $\text{H}^+$  V-ATPases in leech integument, but epithelial  $\text{Na}^+$  channels are, as in vertebrates, selectively blocked by amiloride and represent a rate-limiting target for the control of transcellular  $\text{Na}^+$  uptake (Weber et al., 1993, 1995).

In the last 40 years, vertebrate epithelia have been the preferred models for investigating  $\text{Na}^+$  transport in tight epithelia. Regulation of  $\text{Na}^+$  absorption occurs in several ways (Garty and Palmer, 1997), the major stimulus in vertebrates being the mineralocorticoid aldosterone. This steroid hormone mediates long-term adaptation by influencing the expression of regulatory factors at both transcriptional and translational levels. Peptides, for example antidiuretic hormone (ADH), bind to G-protein-coupled receptors and exert their regulatory effects within minutes. Invertebrates such as the leech also

possess these phylogenetically old antidiuretic hormones, but they lack the mineralocorticoid system found in vertebrates (Oumi et al., 1994; Proux et al., 1987; Salzet et al., 1993, 1995; Satake et al., 1999). To investigate the processes underlying  $\text{Na}^+$  transport across tight epithelia in invertebrates, we used the integument of the leech *Hirudo medicinalis* for electrophysiological measurements (Milde et al., 2001; Schnizler and Clauss, 1998; Weber et al., 1993, 1995).

The regulatory properties of vertebrate epithelial  $\text{Na}^+$  channels have been subject to intensive study over the last 10 years, and regulation of these epithelial  $\text{Na}^+$  channels occurs by modulation of channel activity within the apical cell membranes as well as by control of the total number in surface-expressed channels (Garty and Palmer, 1997). High extracellular  $\text{Na}^+$  concentrations induce  $\text{Na}^+$  self-inhibition, a mechanism that downregulates amiloride-sensitive apical  $\text{Na}^+$  entry (Palmer et al., 1998; Turnheim, 1991). Furthermore, in a variety of epithelia, downregulation of apical  $\text{Na}^+$  conductances was observed when intracellular  $\text{Na}^+$  concentration increased. This autoregulative  $\text{Na}^+$  feedback inhibition represents a short-term adaptive process, and current  $\text{Na}^+$  feedback inhibition models postulate an intracellular, as yet unidentified,  $\text{Na}^+$ -sensing receptor that mediates, through G-protein-coupled mechanisms, a ubiquitin-protein ligase (Nedd4)-dependent endocytosis and degradation of the epithelial  $\text{Na}^+$  channels (Ishibashi et al., 1999; Komwatana et al., 1998). The involvement of G proteins was not confirmed in all cases, however (Hubner et al., 1999).

Living in fresh water and only occasionally entering brackish water (Herter, 1939), *Hirudo medicinalis* cannot be expected to be a euryhaline organism. Nevertheless, our previous studies showed that the leech integument reduces electrogenic  $\text{Na}^+$  uptake in the presence of high apical  $\text{Na}^+$  concentrations. This short-term adaptive downregulation was maintained for several hours (as long as the experiments lasted) and quickly became inoperative after a return to low- $[\text{Na}^+]$  conditions (Weber et al., 1995). Adult leeches survive in water of up to 16 ‰ salinity for several months (Boroffka, 1968). There, they behave as hyperosmotic osmoconformers, with hyporegulated  $[\text{Cl}^-]$  in the blood but an accumulation of short-chain carboxylic acids (Nieczej and Zerbst-Boroffka, 1993). In the initial phase (within 4 h) of acclimation, osmotic loss of water and uptake of salt were the prominent passive events. Concentrations of  $\text{Na}^+$ ,  $\text{K}^+$ ,  $\text{Cl}^-$  and of organic anions in the blood were greatly increased (Nieczej and Zerbst-Boroffka, 1993). After a few days, extracellular volume was restored. Our interest in investigating whether there is long-term acclimation of transintegumental ion transport during extended exposures to high-saline conditions arose from these findings. We exposed leeches for several days to a high-salinity environment (200 mmol l<sup>-1</sup> NaCl) to elicit an osmoregulatory long-term adaptation of  $\text{Na}^+$  uptake; the annelids appeared to cope with this excessive physiological stress. The plasma  $\text{Na}^+$  concentration of *Hirudo medicinalis* is approximately 115 mmol l<sup>-1</sup> (Zerbst-Boroffka and Wenning, 1986), and an unhindered influx of  $\text{Na}^+$  from the 200 mmol l<sup>-1</sup>  $\text{Na}^+$

environment would therefore change the physiological situation from absorption to excretion of excess  $\text{Na}^+$ .

For comparative purposes, dorsal segments of these high-salt-adapted and of pondwater-adapted integuments were dissected for Ussing chamber experiments. The preparations were voltage-clamped, and the initial electrophysiological properties determined to expose any differences attributable to high-salt-adaptation at the level of integumental  $\text{Na}^+$  conductances. We measured total transepithelial  $\text{Na}^+$  uptake and the amiloride-sensitive  $\text{Na}^+$  current.

Extracellular nucleotides serve as agonists for a variety of membrane receptors. Besides ionotropic P2X-type receptors, which comprise intrinsic ion channels, two other large families of G-protein-coupled purine receptors, the P2Y- and the P1-receptors with a multitude of subtypes, have been characterized and cloned (Ralevic and Burnstock, 1998; Surprenant et al., 1995). Expression of these receptors has been detected in a variety of epithelia in which they function in the para- and/or autocrine control of transepithelial ion-transport processes (Ralevic and Burnstock, 1998). ATP, for example, may be released from epithelial cells under physiological conditions (Schwiebert, 1999). A reciprocal regulation, stimulation of  $\text{Cl}^-$  secretion accompanied by a reduction in  $\text{Na}^+$  absorption, by extracellular trinucleotides may be a common and cytosolic  $\text{Ca}^{2+}$ -dependent principle of ion-transport control, e.g. in renal or pulmonary epithelia (Cuffe et al., 2000; Hayslett et al., 1995; McCoy et al., 1993). Nucleotides can regulate NaCl transport via P2Y- and P2X-type receptors (McCoy et al., 1999). The distribution of some epithelial purinoceptors is restricted to either the apical or the basolateral membrane, and this accounts for the 'side-specific' regulatory effects of extracellular nucleotides (Casavola et al., 1996, 1997). In the present study, we evaluate the regulatory impact of intercellular nucleotide messengers on the control of ion transport across the leech integument. For this purpose, we measured the effects of adenosine, ATP and the pyrimidine UTP on  $\text{Na}^+$  transport and also investigated whether the removal of apical  $\text{Ca}^{2+}$ , which is known greatly to stimulate transintegumental current (Prusch and Otter, 1977; Weber et al., 1995), interferes with purinergic control. Examination of pondwater- and high-salt-adapted integuments indicated different sensitivities to extracellular nucleotides.

## Materials and methods

### *Animals and tissue preparation*

*Hirudo medicinalis* L. were obtained from Zaugg (Biebertal, Germany) and were kept without food for 4–10 days either in artificial pondwater (APW; 1 mmol l<sup>-1</sup> NaCl) or in high-salinity water (HSW; 200 mmol l<sup>-1</sup> NaCl) at room temperature (18–24 °C). Before preparation, animals were made torpid by exposure to low temperature (0 °C).

A ventral incision was made in the leech body wall, and the intestine was detached and muscular layers were carefully scraped off. The dorsal integument of the subclitellar region was fixed on a needle-spiked ring. The Ussing chamber had an

aperture of 0.5 cm<sup>2</sup>. The edges of the tissue were sealed with silicone grease. During experiments, both compartments of the Ussing chamber were continuously perfused (apical, at approximately 7 ml min<sup>-1</sup>; basolateral, at approximately 3 ml min<sup>-1</sup>). All experiments were performed at room temperature (18–24 °C). A preparation of the dorsal integument (subclitellar region) was mounted in an Ussing type chamber. After measurement of the initial potential,  $V_{\text{init}}$ , the transepithelial potential,  $V_{\text{T}}$ , was allowed to equilibrate and then clamped to 0 mV. The short-circuit current ( $I_{\text{sc}}$ ) was recorded continuously, and the transepithelial resistance ( $R_{\text{T}}$ ) was calculated from the effects of 20 mV pulses on  $I_{\text{sc}}$ . The amiloride-sensitive current ( $I_{\text{ami}}$ ) was measured as the decrease in  $I_{\text{sc}}$  in the apical presence of apical 100  $\mu\text{mol l}^{-1}$  amiloride.  $I_{\text{Na}}$ , the transepithelial Na<sup>+</sup> current, was when apical NaCl was substituted with equimolar tetramethylammonium chloride (TMA-Cl). Readdition of apical Na<sup>+</sup> re-established the  $I_{\text{sc}}$ .

#### Solutions and chemicals

The basolateral Ringer's solution contained (in mmol l<sup>-1</sup>): 115 NaCl, 4 KCl and 1.8 CaCl<sub>2</sub>. In the apical solution, KCl was replaced with TMA-Cl. In Na<sup>+</sup>-free solutions, NaCl was substituted by equimolar concentrations of TMA-Cl. Ca<sup>2+</sup>-free solutions contained 0.5 mmol l<sup>-1</sup> EDTA. All solutions were buffered with 5 mmol l<sup>-1</sup> Hepes and adjusted to pH 7.4 with Tris (Trizma-base).

APW contained (in mmol l<sup>-1</sup>): 1 NaCl, 0.05 KCl, 0.4 CaCl<sub>2</sub> and 0.2 NaHCO<sub>3</sub>, pH 7.4. HSW contained (in mmol l<sup>-1</sup>): 200 NaCl, 1 KCl, 0.4 CaCl<sub>2</sub> and 0.2 NaHCO<sub>3</sub>, pH 7.4.

Adenosine, ATP, UTP, cyclic AMP [8-(4-chlorophenylthio)-cAMP, cpt-cAMP] and 3-isobutyl-1-methyl-xanthine (IBMX) were obtained from Sigma.

#### Electrical measurements

Ag/AgCl wires in 1 mol l<sup>-1</sup> KCl served as current- or voltage-measuring electrodes. For conductive connection to bathing compartments, 1 mol l<sup>-1</sup> KCl/agar bridges were used. During measurements, the transepithelial potential was voltage-clamped to 0 mV (voltage-clamp amplifier; Nagel, Munich, Germany). The short-circuit current ( $I_{\text{sc}}$ ) was recorded continuously on a stripchart recorder and on computer (Apple IIsi, MacLab interface, chart recorder program: Analog Digital Instruments).  $R_{\text{T}}$  was calculated according to Ohm's law from changes in  $I_{\text{sc}}$  during superimposed 20 mV pulses.

#### Statistical analyses

Data are presented as means  $\pm$  S.E.M.  $N$  is the number of experiments and animals. Statistical analyses were performed using paired or independent Student's  $t$ -tests (Microcal Origin).

## Results

#### Electrophysiological variables

After an equilibration period, the electrophysiological parameters  $V_{\text{T}}$ ,  $I_{\text{sc}}$  and  $R_{\text{T}}$  were measured from both groups of adapted integuments (Table 1). The values of most of the

Table 1. *Electrophysiological variables of pondwater- and high-salinity-adapted leech dorsal integuments*

|                                             | APW                           | HSW                           |
|---------------------------------------------|-------------------------------|-------------------------------|
| Control conditions                          |                               |                               |
| $V_{\text{init}}$ (mV)                      | 17.5 $\pm$ 2.4                | 8.4 $\pm$ 1.5*                |
| $V_{\text{T}}$ (mV)                         | 32.7 $\pm$ 3.9                | 16.2 $\pm$ 2.5*               |
| $R_{\text{T}}$ ( $\Omega$ cm <sup>2</sup> ) | 2038 $\pm$ 346                | 1701 $\pm$ 176                |
| $I_{\text{sc}}$ ( $\mu\text{A cm}^{-2}$ )   | 18.96 $\pm$ 1.76              | 9.56 $\pm$ 1.1*               |
| $I_{\text{ami}}$ ( $\mu\text{A cm}^{-2}$ )  | 4.34 $\pm$ 0.68               | 3.12 $\pm$ 0.48               |
| $I_{\text{Na}}$ ( $\mu\text{A cm}^{-2}$ )   | 7.66 $\pm$ 0.82               | 4.6 $\pm$ 0.54*               |
| Apical Ca <sup>2+</sup> -free conditions    |                               |                               |
| $R_{\text{T}}$ ( $\Omega$ cm <sup>2</sup> ) | 1735 $\pm$ 179                | 1706 $\pm$ 109                |
| $I_{\text{sc}}$ ( $\mu\text{A cm}^{-2}$ )   | 25.88 $\pm$ 1.82 <sup>†</sup> | 22.66 $\pm$ 1.92 <sup>†</sup> |
| $I_{\text{ami}}$ ( $\mu\text{A cm}^{-2}$ )  | 13.54 $\pm$ 1.36 <sup>†</sup> | 10.16 $\pm$ 1.72 <sup>†</sup> |
| $I_{\text{Na}}$ ( $\mu\text{A cm}^{-2}$ )   | 19.44 $\pm$ 1.1 <sup>†</sup>  | 15.96 $\pm$ 1.62 <sup>†</sup> |

APW, artificial pondwater; HSW, high-salinity water.

Values are means  $\pm$  S.E.M.,  $N=16$ .

\*Values of HSW-adapted integuments significantly different from values of APW-adapted integuments,  $P<0.05$ .

<sup>†</sup>Ca<sup>2+</sup>-free values significantly different from control values,  $P<0.05$ .

$V_{\text{init}}$ , initial transepithelial potential;  $V_{\text{T}}$ , transepithelial potential;  $R_{\text{T}}$ , transepithelial resistance;  $I_{\text{sc}}$ , short-circuit current;  $I_{\text{ami}}$ , amiloride-sensitive current;  $I_{\text{Na}}$ , transepithelial Na<sup>+</sup> current.

initial variables were significantly reduced in HSW-adapted compared with APW-adapted integuments. Interestingly, although  $I_{\text{sc}}$  and total  $I_{\text{Na}}$  were greatly decreased by adaptation to 200 mmol l<sup>-1</sup> NaCl,  $I_{\text{ami}}$  was not reduced significantly. Removal of apical Ca<sup>2+</sup> increased  $I_{\text{sc}}$  by a factor of approximately 1.4 in APW-adapted and approximately 2.4 in HSW-adapted integuments (Table 1). The contribution of  $I_{\text{Na}}$  to  $I_{\text{sc}}$  increased from 40 % in APW and 48 % in HSW preparations to 75 % and 70 %, respectively, under Ca<sup>2+</sup>-free conditions (Table 1); however, the amiloride-sensitive portion of total  $I_{\text{Na}}$  remained at approximately 60 % for both groups. The non-Na<sup>+</sup> currents, calculated as the  $I_{\text{sc}}-I_{\text{Na}}$ , even increased slightly in HSW-adapted integuments but decreased in the APW-adapted integuments upon removal of apical Ca<sup>2+</sup>.

#### Regulation of epithelial Na<sup>+</sup> uptake via purinergic receptors

We tested different concentrations of ATP for their effect on transepithelial ion conductances of APW- and HSW-adapted integuments. ATP was applied to the basolateral side at concentrations of 10  $\mu\text{mol l}^{-1}$  to 10 mmol l<sup>-1</sup> (Fig. 1). Maximal stimulation was observed in all preparations with 1 mmol l<sup>-1</sup> ATP, giving a concentration required for 50 % stimulation ( $\text{EC}_{50}$ ) of approximately 80  $\mu\text{mol l}^{-1}$ . Exposure to 1 mmol l<sup>-1</sup> ATP did not affect  $I_{\text{sc}}$  in APW-adapted integuments (98.7 $\pm$ 6.9 %;  $N=5$ ) (Fig. 2). In HSW-adapted integuments ATP induced a twofold (214.7 $\pm$ 42.1 %) increase in  $I_{\text{sc}}$ , which resulted from the activation of Na<sup>+</sup> conductances (Fig. 2). This, in turn, could be attributed to a more than threefold (364 $\pm$ 103.9 %) increase in the amiloride-sensitive current. In comparison, in APW-adapted integuments,  $I_{\text{ami}}$  increased only

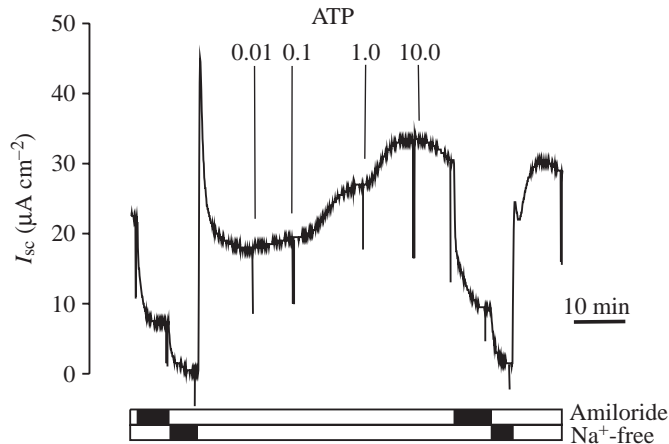

Fig. 1. Original recording of short-circuit current ( $I_{sc}$ ) from leech integument adapted to high-salinity water. Increasing concentrations of ATP (in  $\text{mmol l}^{-1}$ ) were added to the basolateral compartment at the indicated times. Note the weak decrease in  $I_{sc}$  in response to  $10 \text{ mmol l}^{-1}$  ATP. The current sensitive to  $100 \mu\text{mol l}^{-1}$  amiloride was determined before superfusion with  $\text{Na}^+$ -free Ringer's solution; periods of superfusion are shown below the recording.

slightly (by  $187.5 \pm 33\%$ ) at the cost of other  $\text{Na}^+$  conductances (not shown). The ATP-induced  $I_{ami}$  was larger than the subsequently determined net  $\text{Na}^+$  transport ( $I_{Na}$ ; Table 2). This paradoxical finding may be explained by additional effects of apical  $\text{Na}^+$ -free conditions on, for example,  $\text{Cl}^-$  conductances. Higher concentrations, such as  $10 \text{ mmol l}^{-1}$  ATP, partially deactivated  $I_{sc}$  again. This downregulation phenomenon in the presence of  $10 \text{ mmol l}^{-1}$  ATP was observed in all experiments (data not shown). Apical application of ATP ( $1 \text{ mmol l}^{-1}$ ) also greatly stimulated  $I_{sc}$ , a result that was not further investigated.

Under apical  $\text{Ca}^{2+}$ -free conditions, ATP had no effect on  $I_{sc}$  across APW-adapted integuments ( $112.8 \pm 6.8\%$ ). In contrast,

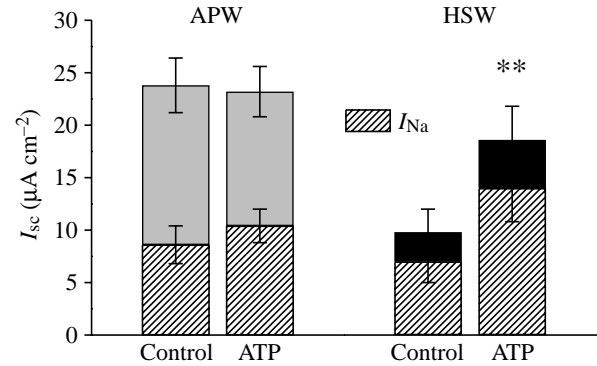

Fig. 2. Effect of basolateral ATP on short-circuit current ( $I_{sc}$ ) of artificial pondwater (APW)- and high-salinity (HSW)-adapted integuments. Transepithelial  $\text{Na}^+$  current was determined after  $I_{sc}$  had reached steady state (control). Subsequently  $1 \text{ mmol l}^{-1}$  ATP was added to the basolateral compartment and transepithelial  $\text{Na}^+$  current ( $I_{Na}$ ) was determined again (ATP) when  $I_{sc}$  had stabilized. Values are means  $\pm$  S.E.M. ( $N=5$ ). ATP significantly increased  $I_{Na}$  in HSW-adapted preparations,  $**P<0.005$ . Hatched columns, transepithelial  $\text{Na}^+$  current; filled columns, residual non- $\text{Na}^+$  currents.

upregulated  $I_{sc}$  across HSW-adapted integuments under  $\text{Ca}^{2+}$ -free conditions responded to  $1 \text{ mmol l}^{-1}$  ATP with a significant increase to  $136.3 \pm 6.4\%$ . ATP preferentially stimulated  $\text{Na}^+$  uptake and had very little effect on non- $\text{Na}^+$  conductances. This effect of ATP on transepithelial  $\text{Na}^+$  transport in HSW-adapted integuments was largely due to an upregulation of  $I_{ami}$  by a factor of  $235.9 \pm 49.5\%$ , whereas  $I_{ami}$  increased to  $185.4 \pm 27.9\%$  in APW-adapted integuments (not shown).

Certain types of P2Y receptor selectively bind uridine nucleotides but not adenosine nucleotides (Lazarowski and Boucher, 2001; Ralevic and Burnstock, 1998). UTP ( $1 \text{ mmol l}^{-1}$ ) was added either to the apical or basolateral compartment and tested for its effect on macroscopic

Table 2. Effect of basolateral application of extracellular nucleotides on different currents in leech dorsal integuments under control and apical  $\text{Ca}^{2+}$ -free conditions

|                                          | ATP                |                    | UTP              |                  | Adenosine          |                  |
|------------------------------------------|--------------------|--------------------|------------------|------------------|--------------------|------------------|
|                                          | APW                | HSW                | APW              | HSW              | APW                | HSW              |
| Control conditions                       |                    |                    |                  |                  |                    |                  |
| $I_{sc}$ ( $\mu\text{A cm}^{-2}$ )       | $23.10 \pm 2.48$   | $18.60 \pm 3.22$   | $11.30 \pm 1.12$ | $9.50 \pm 1.38$  | $14.50 \pm 2.30$   | $13.0 \pm 1.40$  |
| $I_{ami}$ ( $\mu\text{A cm}^{-2}$ )      | $13.50 \pm 1.02$   | $14.30 \pm 2.68$   | $2.76 \pm 1.16$  | $5.76 \pm 1.46$  | $5.15 \pm 1.58$    | $3.80 \pm 0.70$  |
| $I_{Na}$ ( $\mu\text{A cm}^{-2}$ )       | $10.30 \pm 1.60$   | $14.0 \pm 3.24$    | $3.76 \pm 0.78$  | $6.88 \pm 1.68$  | $7.70 \pm 1.58$    | $5.20 \pm 0.82$  |
| $R_T$ ( $\Omega \text{ cm}^2$ )          | $3739 \pm 366$     | $4221 \pm 330$     | $8400 \pm 1615$  | $6537 \pm 1816$  | $5354 \pm 1259$    | $3214 \pm 424$   |
| Apical $\text{Ca}^{2+}$ -free conditions |                    |                    |                  |                  |                    |                  |
| $I_{sc}$ ( $\mu\text{A cm}^{-2}$ )       | $27.10 \pm 4.58$   | $31.62 \pm 3.24^*$ | $19.20 \pm 6.44$ | $17.95 \pm 2.70$ | $19.40 \pm 1.86$   | $16.62 \pm 2.04$ |
| $I_{ami}$ ( $\mu\text{A cm}^{-2}$ )      | $22.10 \pm 1.52^*$ | $24.50 \pm 3.54^*$ | $11.40 \pm 1.94$ | $10.20 \pm 1.30$ | $8.20 \pm 1.30$    | $6.76 \pm 1.56$  |
| $I_{Na}$ ( $\mu\text{A cm}^{-2}$ )       | $24.50 \pm 1.44^*$ | $28.88 \pm 3.40^*$ | $15.10 \pm 3.06$ | $15.30 \pm 0.98$ | $14.70 \pm 1.20^*$ | $11.38 \pm 2.10$ |
| $R_T$ ( $\Omega \text{ cm}^2$ )          | $2701 \pm 343$     | $3028 \pm 394$     | $5709 \pm 1067$  | $4659 \pm 740$   | $3980 \pm 708$     | $3897 \pm 230$   |

Values are means  $\pm$  S.E.M.,  $N=5$ .

\* $\text{Ca}^{2+}$ -free values significantly different from control values,  $P<0.05$ .

Note that there are no significant differences between the artificial pondwater-adapted (APW) and high-salinity-adapted (HSW) integuments.  $I_{sc}$ , short-circuit current;  $I_{ami}$ , amiloride-sensitive current;  $I_{Na}$ , transepithelial  $\text{Na}^+$  current;  $R_T$ , transepithelial resistance.



transepithelial ion conductances across APW- and HSW-adapted integuments. Apical treatment with  $1 \text{ mmol l}^{-1}$  UTP left  $I_{\text{sc}}$ ,  $I_{\text{Na}}$  and its amiloride-sensitive component  $I_{\text{ami}}$  unaffected in both integuments (data not shown). While  $I_{\text{ami}}$  of APW-adapted integuments responded somewhat inconsistently to basolateral UTP, the  $I_{\text{sc}}$  was reduced to 87 % compared with the control value and total  $I_{\text{Na}}$  was not significantly affected. Under apical  $\text{Ca}^{2+}$ -free conditions, UTP had no effect on  $I_{\text{sc}}$ . In addition, the basolateral side of HSW-adapted integuments was insensitive to  $1 \text{ mmol l}^{-1}$  UTP under both normal and  $\text{Ca}^{2+}$ -free conditions.

#### Regulation of $\text{Na}^+$ transport by adenosine /P1-receptors

We examined the effects of extracellular adenosine in the apical and the basolateral compartments.  $I_{\text{sc}}$  and  $\text{Na}^+$  currents across APW- and HSW-adapted integuments were insensitive to apical adenosine (data not shown). While  $I_{\text{sc}}$ ,  $I_{\text{Na}}$  and  $I_{\text{ami}}$  in APW-adapted integuments were largely unaffected by basolateral application of adenosine, the  $I_{\text{sc}}$  of HSW-adapted integuments increased in a concentration-dependent manner (Fig. 3). A maximal, stable and non-transient activation of  $I_{\text{sc}}$  was observed in the presence of  $10 \text{ mmol l}^{-1}$  adenosine ( $204 \pm 35$  % of control amplitude;  $N=5$ ;  $\text{EC}_{50}=0.17 \text{ mmol l}^{-1}$ ). In contrast to the effect of ATP described above, the net increase in  $I_{\text{sc}}$  was due to a stimulation of non- $\text{Na}^+$  conductances (Fig. 4). Interestingly, in HSW-adapted integuments, adenosine increased  $I_{\text{ami}}$  current to  $188.1 \pm 18.7$  % without changing total  $I_{\text{Na}}$  (Fig. 4). Basolateral treatment with  $1 \text{ mmol l}^{-1}$  adenosine, after upregulation of  $\text{Na}^+$  currents by  $\text{Ca}^{2+}$ -free conditions, had no significant effect on  $I_{\text{sc}}$  or on the component of  $I_{\text{sc}}$  carried by  $\text{Na}^+$ .  $I_{\text{ami}}$ , however was slightly reduced to  $79.5 \pm 5.6$  % in APW-adapted integuments, whereas it increased in HSW-adapted integuments to  $175.6 \pm 65.2$  % in response to adenosine. The size of this effect varied substantially, but it was observed in all preparations tested.

Table 2 summarizes the currents and the effects of apical  $\text{Ca}^{2+}$ -free conditions in the basolateral presence of  $1 \text{ mmol l}^{-1}$

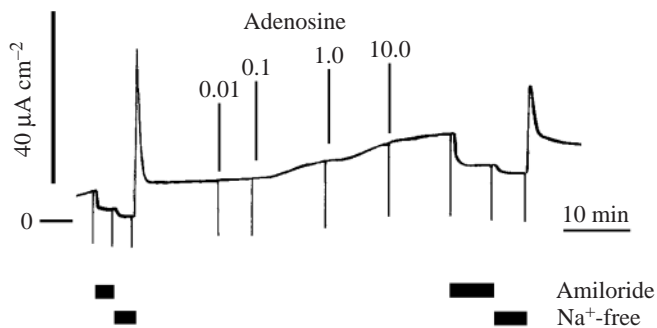

Fig. 3. Original recording of short-circuit current ( $I_{\text{sc}}$ ) from high-salinity-adapted integument. Adenosine ( $1 \text{ mmol l}^{-1}$ ) was added in increasing concentrations to the basolateral compartment to give the final concentrations ( $\text{mmol l}^{-1}$ ) indicated. The current sensitive to  $100 \mu\text{mol l}^{-1}$  amiloride was determined before superfusion with  $\text{Na}^+$ -free Ringer's solution; periods of superfusion are shown below the recording.

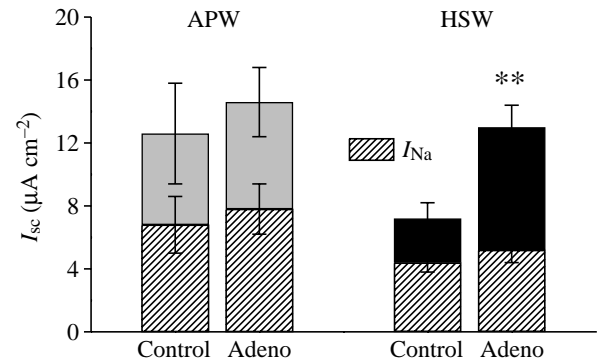

Fig. 4. Effect of basolateral adenosine upon transepithelial currents of leech dorsal integuments. Integuments adapted to artificial pondwater (APW) or high-salinity (HSW) were clamped to  $0 \text{ mV}$ . Transepithelial  $\text{Na}^+$  current ( $I_{\text{Na}}$ ) was determined after equilibration (Control). Subsequently,  $1 \text{ mmol l}^{-1}$  adenosine was added to the basolateral compartment and, when the short-circuit current ( $I_{\text{sc}}$ ) had stabilized,  $I_{\text{Na}}$  was determined again (Adeno). Values are means  $\pm$  S.E.M. ( $N=5$ ). Addition of  $1 \text{ mmol l}^{-1}$  adenosine to the basolateral compartment significantly increased  $I_{\text{sc}}$  but not  $I_{\text{Na}}$  in HSW-adapted integuments,  $**P<0.005$ . Hatched columns, transepithelial  $\text{Na}^+$  current; filled columns, residual non- $\text{Na}^+$  currents.

ATP, UTP and adenosine. Transepithelial ion conductances have been reported to be regulated by extracellular adenosine and through cyclic AMP/protein kinase A (PKA) signalling mechanisms. We treated APW- and HSW-adapted integuments in the absence of apical  $\text{Ca}^{2+}$  with membrane-permeant  $100 \mu\text{mol l}^{-1}$  cpt-cAMP in combination with  $1 \text{ mmol l}^{-1}$  IBMX (an inhibitor of phosphodiesterases). However, this effect of cyclic AMP was abolished under  $\text{Ca}^{2+}$ -free conditions. Both  $I_{\text{Na}}$  and the non- $\text{Na}^+$  current were

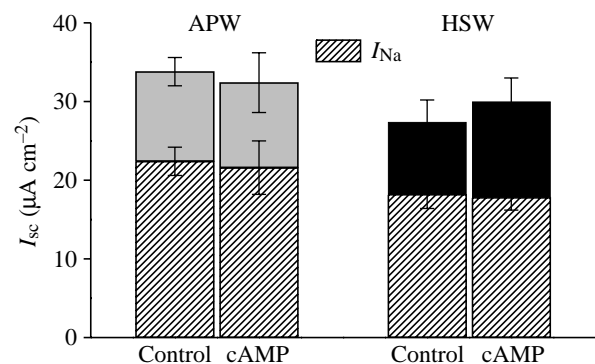

Fig. 5. Effect of apical 8-(4-chlorophenylthio)-cyclic AMP (cAMP) on short-circuit current ( $I_{\text{sc}}$ ) of artificial pondwater (APW)-adapted or high-salinity (HSW)-adapted leech integuments under apical  $\text{Ca}^{2+}$ -free conditions.  $\text{Ca}^{2+}$  was removed from the apical compartment and, when  $I_{\text{sc}}$  had stabilized, transepithelial  $\text{Na}^+$  current ( $I_{\text{Na}}$ ) and non- $\text{Na}^+$  currents were determined (Control). cAMP ( $100 \mu\text{mol l}^{-1}$ ) and 3-isobutyl-1-methyl-xanthine ( $1 \text{ mmol l}^{-1}$ ) were added.  $I_{\text{Na}}$  was determined by apical perfusion with  $\text{Na}^+$ -free Ringer (cAMP). Values are means  $\pm$  S.E.M. ( $N=6$ ). Hatched columns,  $I_{\text{Na}}$ ; filled columns, residual non- $\text{Na}^+$  currents.

unaltered by cyclic AMP (Fig. 5). The amiloride-sensitive part of  $I_{Na}$  did not change in APW-adapted ( $94 \pm 6\%$ ) or HSW-adapted integuments ( $102 \pm 8\%$ ). The apical epithelial  $Na^+$  channels were therefore not affected.

### Discussion

*Hirudo medicinalis* proved to be reasonably tolerant of transfer to a high-salinity environment (Boroffka, 1968; Nieczaj and Zerbst-Boroffka, 1993). The initial phase, consisting of loss of water and accumulation of  $Na^+$ ,  $Cl^-$  and organic anions, is followed by long-term acclimation, as for a hyperosmotic osmoconformer (Nieczaj and Zerbst-Boroffka, 1993). After several days, plasma volume is restored, while intracellular water content is not (Nieczaj and Zerbst-Boroffka, 1993). How this physiological acclimation affects transintegumental ion transport was the subject of the present study.

Pondwater presents the leech integument with the problem of absorbing ions against considerable electrochemical gradients. The apical transport of  $Na^+$  requires energy and may be driven by proton-motive forces from, for example,  $H^+$  V-ATPases (Ehrenfeld and Klein, 1997; Nelson and Harvey, 1999). In high-salinity conditions the situation for overall ion regulation is reversed. Extracellular  $200 \text{ mmol l}^{-1} Na^+$  exceeds plasma concentrations ( $115\text{--}140 \text{ mmol l}^{-1}$ ) (Prusch and Otter, 1977; Zerbst-Boroffka and Wenning, 1986) and should therefore result in increased levels of body salts. Shutdown of apical  $Na^+$  conductances and extrusion of excess salt by, for example, nephridia may then balance total  $Na^+$  uptake (Zerbst-Boroffka and Wenning, 1986). To determine when long-term (transcriptional and/or translational) regulation of ion transport sets in, one would have to perform a series of time-course experiments that specify time required for changes in electrical properties of the leech integument. However, such an approach is difficult because this epithelium shuts down ion transport in the presence of high apical  $Na^+$  concentrations.  $Na^+$  uptake recovers soon after a return to low- $[Na^+]$  conditions (Weber et al., 1995; M. Schnizler, personal observations). The recovery of  $Na^+$  transport after a shift from apical high- $Na^+$  conditions to low- $Na^+$  conditions is repeatably reproducible and the phenomenon remains unchanged even after exposure to high- $Na^+$  conditions for more than 5 h. We therefore decided to extend the high-salt challenge over several days, by which time long-term adaptive processes could be expected to have occurred (Nieczaj and Zerbst-Boroffka, 1993). Recent models attribute triggering of the autoregulative feedback inhibition of  $Na^+$  transport in tight epithelia to an elevation in intracellular  $[Na^+]$  (Palmer et al., 1998; Turnheim, 1991). The phenomenon is a short-term adaptive process that starts immediately and is reproducible for several cycles of transfer from low to high salinity. There is evidence for  $Na^+$ -sensing receptors that mediate the endocytosis of epithelial  $Na^+$  channels and their subsequent degradation (Hubner et al., 1999; Ishibashi et al., 1999; Komwatana et al., 1998). The feedback inhibition is therefore due to a reduction in the total number of surface-

expressed channels. We expected the high-salt exposure of several days not only drastically to reduce transcellular  $Na^+$  transport but also to affect the number of new vesicle-stored channels available for apical membrane insertion. Long-term adaptation to high-salt conditions reduced  $V_T$  and  $I_{sc}$  (Table 1). However, although transepithelial  $Na^+$  uptake was downregulated, the amiloride-sensitive transcellular  $Na^+$  current ( $I_{ami}$ ) was not affected (Table 1).

#### *Effect of $Ca^{2+}$ and purinergic signalling*

High extracellular  $Na^+$  concentrations are generally believed to elevate cytosolic  $Ca^{2+}$  concentrations which, in turn, inhibit the amiloride-sensitive  $Na^+$  channels, either directly or by protein-kinase-C-mediated mechanisms (Garty and Palmer, 1997). Despite persistent evidence for the importance of  $Ca^{2+}$  in short-term  $Na^+$  feedback inhibition, their direct involvement could not be verified (Abriel and Horisberger, 1999). It is not clear whether the downregulation of transcellular  $Na^+$  uptake by apical  $Ca^{2+}$  results from interactions with elements in the apical membranes or by  $Ca^{2+}$  entering the cells and increasing cytosolic  $Ca^{2+}$  concentrations (Abriel and Horisberger, 1999; Palmer et al., 1998; Turnheim, 1991). In addition to a direct and possibly non-specific action upon  $Na^+$  channels or regulatory factors, G-protein-coupled  $Ca^{2+}$ -sensing mechanisms may come into play (Komwatana et al., 1998). Surface expression of such  $Ca^{2+}$  receptors has been reported for several tissues (Brown et al., 1993; Riccardi, 2000), but their presence in the leech integument must first be verified.

One objective of our study was to investigate whether long-term acclimation to high-salt conditions affects this short-term regulation of transcellular  $Na^+$  uptake and its sensitivity to apical  $Ca^{2+}$ . Both high-salt- and pondwater-adapted integument responded to the removal of apical  $Ca^{2+}$  with an increased  $I_{sc}$  to values of similar magnitude, and this was mainly due to an upregulation of  $I_{ami}$  (Table 1). Thus, the amiloride-sensitive  $Na^+$  conductances are partly inhibited by the extracellular presence of  $Ca^{2+}$ . This stimulating effect of  $Ca^{2+}$  removal in the leech skin may be correlated with downregulated  $Na^+$  transport since only under apical high  $Na^+$ -conditions could  $I_{sc}$  be stimulated by the removal of apical  $Ca^{2+}$  (Weber et al., 1995).

Transcellular transport of  $Ca^{2+}$  occurs in a variety of epithelia, and apical entry of  $Ca^{2+}$  greatly affects intracellular  $Ca^{2+}$  concentrations (Hoenderop et al., 2000). In vertebrates, for example, there are epithelial  $Ca^{2+}$  channels that lose their selectivity and transport monovalent cations in the absence of extracellular  $Ca^{2+}$  (Vassilev et al., 2001). Total removal of apical  $Ca^{2+}$  can be expected to reduce cytosolic  $[Ca^{2+}]$ . Basolateral electrogenic  $3Na^+/1Ca^{2+}$  exchange processes are considerably downregulated in this situation, and this may explain upregulation of transcellular  $Na^+$  transport in  $Ca^{2+}$ -free conditions (Blaustein and Lederer, 1999; Hoenderop et al., 2000). Interestingly, the stimulating effect of a removal of  $Ca^{2+}$  was greater in HSW-adapted than in APW-adapted integuments, but the final upregulated currents from HSW-adapted integuments were equal to those from APW-adapted

integuments (Table 1). We do not know the extent to which vesicular translocation of new channels contributed to the effect of  $\text{Ca}^{2+}$ , but as a result of long-term adaptation, one would expect a marked reduction in *de novo* synthesis of channels rather than the formation of channel-containing membrane vesicles. The rapid upregulation observed indicated *in situ* activation of silent, but surface-expressed,  $\text{Na}^+$  channels.

### P2 receptors

Locally released ATP has a direct paracrine and/or autocrine effect modulating epithelial transporters and channels. Reciprocal regulation of  $\text{Cl}^-$  secretion and  $\text{Na}^+$  absorption by extracellular nucleotides appears to be a common feature of mammalian respiratory and renal epithelia (Cuffe et al., 2000; Mall et al., 2000; McCoy et al., 1999). ATP and UTP stimulate  $\text{Cl}^-$  secretion, whereas apical  $\text{Na}^+$  entry is downregulated (Cuffe et al., 2000; Inglis et al., 1999). In frog skin epithelium, the classic model for  $\text{NaCl}$  absorption from fresh water, ATP and UTP affect the short-term regulation of transepithelial ion transport (Brodin and Nielsen, 2000b). However, in this case, transcellular amiloride-sensitive  $\text{Na}^+$  transport increased in response to extracellular nucleotides, but  $\text{Cl}^-$  conductances seemed not to be affected (Brodin and Nielsen, 2000a). Testing whether trinucleotides mediate transintegumental ion regulation in our limnic invertebrate, we found a different situation. We were unable to detect any significant ATP sensitivity of  $I_{\text{sc}}$  in APW-adapted integuments. In contrast, adaptation to high-salt conditions increased the sensitivity of  $I_{\text{sc}}$  to  $1 \text{ mmol l}^{-1}$  ATP applied from the basolateral side (Fig. 2). Adaptation to high-salt conditions resulted in the recruitment of ATP-triggered transduction mechanisms that are not present or remain silent in a pondwater environment.  $I_{\text{ami}}$  was upregulated in integuments adapted to both conditions although the HSW-adapted preparations responded more strongly (Fig. 2, Table 2). The inhibition of this basolateral effect of ATP by amiloride clearly identified epithelial  $\text{Na}^+$  channels localized in the apical membrane as the upregulated target, suggesting the involvement of transduction mechanisms that trigger the release of diffusible second messengers. The time course of upregulation of  $I_{\text{sc}}$  was a typical response to ATP (Fig. 1), supporting the idea of a slower messenger-mediated process.

The principal agonists for P2X receptors appear to be ATP and its derivatives, but not UTP. Neither basolateral nor apical application of  $1 \text{ mmol l}^{-1}$  UTP had a dramatic effect on  $I_{\text{sc}}$  or  $I_{\text{Na}}$  in integuments adapted to both conditions (Table 2), which suggests the existence of P2X-mediated processes. Following activation by ATP, ligand-gated P2X receptors open their intrinsic non-selective cation channel, allowing  $\text{Na}^+$  and  $\text{Ca}^{2+}$  to pass from the extracellular fluid into the cell. Cellular release of ATP therefore provides one mechanism for controlling intracellular  $\text{Ca}^{2+}$  concentration and downstream transduction processes (Bean, 1992; Dubyak and el-Moatassim, 1993). In general, P2X- and P2Y-receptor-induced regulation of transepithelial  $\text{Na}^+$  absorption and/or  $\text{Cl}^-$  secretion is mediated

by an increase in cytosolic  $[\text{Ca}^{2+}]$  (Cuffe et al., 2000; Mall et al., 2000; McCoy et al., 1999) as a result of extracellular  $\text{Ca}^{2+}$  entering the cell *via* P2X receptors or a P2Y-induced release of  $\text{Ca}^{2+}$  from intracellular stores. However, the absence of  $\text{Ca}^{2+}$  from apical solution did not prevent the stimulating effect of basolateral ATP on  $\text{Na}^+$  conductances in HSW-adapted integuments (Table 2).  $I_{\text{ami}}$  was again upregulated, although the response was less pronounced. A significant contribution of  $\text{Ca}^{2+}$  influx to the transduction of purinergic stimulation of  $I_{\text{ami}}$  cannot be ruled out since, for example, the previously observed upregulation of  $I_{\text{sc}}$  or the total  $I_{\text{Na}}$  in HSW-adapted integuments by ATP are reduced or in some cases even prevented after removal of apical  $\text{Ca}^{2+}$ . A further explanation may be that  $\text{Ca}^{2+}$  greatly prestimulates amiloride-sensitive  $\text{Na}^+$  conductances, leaving fewer quiescent apical  $\text{Na}^+$  channels to be activated *in situ* by further, i.e. purine-induced, mechanisms. Hydrolysis or the conversion of exogenous nucleotides by ecto-nucleotidases (Harden et al., 1997) may be one explanation for the requirement of concentrations as high as  $1 \text{ mmol l}^{-1}$  ATP to evoke the maximal effect.

At present, no agonists or antagonists are available that discriminate effectively between the families and subtypes of P2X and P2Y receptors (Norenberg and Illes, 2000; Ralevic and Burnstock, 1998; von Kugelgen and Wetter, 2000) and little is known about invertebrate orthologues and their pharmacology. Thus, it is difficult to characterize the basolateral leech ATP receptors and to prove a correlation between their relative expression levels and environmental salinity using northern blots or quantitative reverse transcriptase/polymerase chain reactions.

### P1 receptors

Adenosine has been reported to have pleiotropic actions in epithelia (McCoy et al., 1993; Olah and Stiles, 1992).  $\text{Na}^+$  uptake by tight epithelia, e.g. in the medullary collecting duct cells of the rat kidney, is controlled by extracellular adenosine (Yagil, 1994). In A6 cell monolayers (cells from *Xenopus laevis* nephron), A1 receptors are located on the apical surface and regulate  $\text{Cl}^-$  secretion or inhibition of transepithelial  $\text{Na}^+$  transport *via* stimulation of phospholipase C activity. On the basolateral surface, there are  $\text{A}_{2\text{A}}$  receptors, which stimulate  $\text{Na}^+$  uptake (Casavola et al., 1996, 1997). This positive effect is believed to be due to upregulation of cyclic AMP production followed by stimulation of  $\text{Na}^+/\text{H}^+$  exchange activity. The restricted distribution of receptors to the apical or basolateral membrane and the distinct post-receptor mechanisms are both responsible for the dual-control regulation by adenosine of transepithelial ion conductances.

In the leech integument, addition of adenosine to the apical compartment failed to have any effect on macroscopic  $I_{\text{sc}}$ . Instead, we found that activation of basolateral adenosine receptors only stimulated  $I_{\text{sc}}$  in HSW-adapted integuments and not in pondwater-adapted controls. Net  $\text{Na}^+$  transport was not upregulated, and we assume that  $\text{Cl}^-$  conductances are targets for this effect of adenosine (Fig. 4). The slope of the current traces indicated that this activation of HSW-adapted



integuments was a monophasic but rather slow process (Fig. 3). Interestingly, the amiloride-sensitive portion of  $I_{Na}$  was enlarged at the expense of other  $Na^+$  conductances. This effect was abolished under  $Ca^{2+}$ -free conditions.

After ligand-binding by certain purinoceptors, the signal is propagated in some cases by cyclic AMP/PKA-mediated pathways (Ralevic and Burnstock, 1998). Under normal conditions, membrane-permeant cyclic AMP activates amiloride-sensitive currents across leech integuments (Weber et al., 1995). We applied cpt-cAMP after the effect of the removal of  $Ca^{2+}$  had concluded, but could detect no convincing effect of this compound on transintegumental ion conductances, however (Fig. 5).  $I_{ami}$  across APW-adapted integuments was slightly reduced rather than stimulated, and  $I_{ami}$  across HSW-adapted integuments was unchanged. Interestingly, the overall  $Na^+$  current,  $I_{Na}$  was unaltered by the addition of cpt-cAMP (Fig. 5), possibly indicating that apical  $Ca^{2+}$ -free conditions had stimulated the  $Na^+$  conductances to their maximum. High concentrations of adenosine were required to induce the maximal response, so mechanisms other than binding to metabotropic receptors must be taken into consideration. The nucleosides may have entered the cells and initiated further processes.

In conclusion, the leech integument provides a useful model for investigating the regulation of ion transport in an invertebrate tight epithelium. Adaptation of leeches to high-salinity conditions altered most of the initial electrophysiological properties of the integuments but left the amiloride-sensitive  $Na^+$  current unaffected. Absence of apical  $Ca^{2+}$  stimulated the bioelectrical activities in integuments adapted to high-salinity conditions and pondwater to a similar extent. Long-term exposure to high (200 mmol l<sup>-1</sup>) NaCl concentration conferred ATP-sensitivity to the  $I_{sc}$  and the  $I_{Na}$ , although there was little effect on control integuments. Our findings provided no evidence that UTP has any relevance in the control of ion-transport processes across the leech integument. Adenosine upregulated transepithelial non- $Na^+$  currents in HSW-integuments, while APW-adapted preparations were largely unaffected by this nucleoside. The surface expression of adenosine/P1 receptors was restricted to the basolateral membrane. These disparities in sensitivity to extracellular purines may be caused by differentially expressed receptors or regulatory factors during adaptation to high-salt conditions. Finally, one can argue that high-salt stress is a situation that a leech will never face under natural conditions. Nevertheless, exposure to such physiological challenges provides an opportunity for detecting variances of macroscopic variables, for instance transepithelial ion conductances, which may indicate assimilative processes in a whole-animal model and initiate more fine-tuned approaches in future projects.

This study was supported by the Deutsche Forschungsgemeinschaft DFG. We thank Margret Hündt, Siegfried Kristek and Bernhardt Kahnert for excellent technical assistance.

## References

- Abriel, H. and Horisberger, J. D. (1999). Feedback inhibition of rat amiloride-sensitive epithelial sodium channels expressed in *Xenopus laevis* oocytes. *J. Physiol. Lond.* **516**, 31–43.
- Bean, B. P. (1992). Pharmacology and electrophysiology of ATP-activated ion channels. *Trends Pharmacol. Sci.* **13**, 87–90.
- Blaustein, M. P. and Lederer, W. J. (1999). Sodium/calcium exchange: its physiological implications. *Physiol. Rev.* **79**, 763–854.
- Boroffka, I. (1968). Osmo- und Volumenregulation bei *Hirudo medicinalis*. *Z. Vergl. Physiol.* **57**, 348–375.
- Brodin, B. and Nielsen, R. (2000a). Electrophysiological evidence for an ATP-gated ion channel in the principal cells of the frog skin epithelium. *Pflügers Arch.* **439**, 227–233.
- Brodin, B. and Nielsen, R. (2000b). Evidence for P2Y-type ATP receptors on the serosal membrane of frog skin epithelium. *Pflügers Arch.* **439**, 234–239.
- Brown, E. M., Gamba, G., Riccardi, D., Lombardi, M., Butters, R., Kifor, O., Sun, A., Hediger, M. A., Lytton, J. and Hebert, S. C. (1993). Cloning and characterization of an extracellular  $Ca^{2+}$ -sensing receptor from bovine parathyroid. *Nature* **366**, 575–580.
- Casavola, V., Guerra, L., Reshkin, S. J., Jacobson, K. A. and Murer, H. (1997). Polarization of adenosine effects on intracellular pH in A6 renal epithelial cells. *Mol. Pharmacol.* **51**, 516–523.
- Casavola, V., Guerra, L., Reshkin, S. J., Jacobson, K. A., Verrey, F. and Murer, H. (1996). Effect of adenosine on  $Na^+$  and  $Cl^-$  currents in A6 monolayers. Receptor localization and messenger involvement. *J. Membr. Biol.* **151**, 237–245.
- Cuffe, J. E., Bielfeld-Ackermann, A., Thomas, J., Leipziger, J. and Korbmayer, C. (2000). ATP stimulates  $Cl^-$  secretion and reduces amiloride-sensitive  $Na^+$  absorption in M-1 mouse cortical collecting duct cells. *J. Physiol. Lond.* **524**, 77–90.
- Dubyak, G. R. and el-Moatassim, C. (1993). Signal transduction via P2-purineric receptors for extracellular ATP and other nucleotides. *Am. J. Physiol.* **265**, C577–C606.
- Ehrenfeld, J. and Klein, U. (1997). The key role of the  $H^+$  V-ATPase in acid-base balance and  $Na^+$  transport processes in frog skin. *J. Exp. Biol.* **200**, 247–256.
- Garty, H. and Palmer, L. G. (1997). Epithelial sodium channels: function, structure, and regulation. *Physiol. Rev.* **77**, 359–396.
- Harden, T. K., Lazarowski, E. R. and Boucher, R. C. (1997). Release, metabolism and interconversion of adenine and uridine nucleotides: implications for G protein-coupled P2 receptor agonist selectivity. *Trends Pharmacol. Sci.* **18**, 43–46.
- Hayslett, J. P., Macala, L. J., Smallwood, J. L., Kalghatgi, L., Gasalla-Herraz, J. and Isales, C. (1995). Adenosine stimulation of  $Na^+$  transport is mediated by an A1 receptor and a  $[Ca^{2+}]_i$ -dependent mechanism. *Kidney Int.* **47**, 1576–1584.
- Herter, K. (1939). Die Ökologie der Hirudineen. *Klassen und Ordnungen des Tierreichs*, vol 4, III (ed. H. G. Bronn), pp. 321–496. Leipzig: Akademische Verlagsgesellschaft.
- Hoenderop, J. G., Willems, P. H. and Bindels, R. J. (2000). Toward a comprehensive molecular model of active calcium reabsorption. *Am. J. Physiol.* **278**, F352–F360.
- Hubner, M., Schreiber, R., Boucherot, A., Sanchez-Perez, A., Poronnik, P., Cook, D. I. and Kunzelmann, K. (1999). Feedback inhibition of epithelial  $Na^+$  channels in *Xenopus* oocytes does not require  $G_0$  or  $G_{i2}$  proteins. *FEBS Lett.* **459**, 443–447.
- Inglis, S. K., Collett, A., McAlroy, H. L., Wilson, S. M. and Olver, R. E. (1999). Effect of luminal nucleotides on  $Cl^-$  secretion and  $Na^+$  absorption in distal bronchi. *Pflügers Arch.* **438**, 621–627.
- Ishibashi, H., Dinudom, A., Harvey, K. F., Kumar, S., Young, J. A. and Cook, D. I. (1999).  $Na^+$ - $H^+$  exchange in salivary secretory cells is controlled by an intracellular  $Na^+$  receptor. *Proc. Natl. Acad. Sci. USA* **96**, 9949–9953.
- Komwatana, P., Dinudom, A., Young, J. A. and Cook, D. I. (1998). Activators of epithelial  $Na^+$  channels inhibit cytosolic feedback control. Evidence for the existence of a G protein-coupled receptor for cytosolic  $Na^+$ . *J. Membr. Biol.* **162**, 225–232.
- Lazarowski, E. R. and Boucher, R. C. (2001). UTP as an extracellular signaling molecule. *News Physiol. Sci.* **16**, 1–5.
- Mall, M., Wissner, A., Gonska, T., Calenborn, D., Kuehr, J., Brandis, M. and Kunzelmann, K. (2000). Inhibition of amiloride-sensitive epithelial  $Na^+$  absorption by extracellular nucleotides in human normal and cystic fibrosis airways. *Am. J. Respir. Cell. Mol. Biol.* **23**, 755–761.
- McCoy, D. E., Bhattacharya, S., Olson, B. A., Levier, D. G., Arend, L. J.



- and Spielman, W. S. (1993). The renal adenosine system: structure, function, and regulation. *Semin. Nephrol.* **13**, 31–40.
- McCoy, D. E., Taylor, A. L., Kudlow, B. A., Karlson, K., Slattery, M. J., Schwiebert, L. M., Schwiebert, E. M. and Stanton, B. A. (1999). Nucleotides regulate NaCl transport in mIMCD-K2 cells via P2X and P2Y purinergic receptors. *Am. J. Physiol.* **277**, F552–F559.
- Milde, H., Weber, W. M., Salzert, M. and Clauss, W. (2001). Regulation of Na<sup>+</sup> transport across leech skin by peptide hormones and neurotransmitters. *J. Exp. Biol.* **204**, 1509–1517.
- Nelson, N. and Harvey, W. R. (1999). Vacuolar and plasma membrane proton-adenosinetriphosphatases. *Physiol. Rev.* **79**, 361–385.
- Nieczaj, R. and Zerbst-Boroffka, I. (1993). Hyperosmotic acclimation in the leech, *Hirudo medicinalis* L.: energy metabolism, osmotic, ionic and volume regulation. *Comp. Biochem. Physiol.* **106**, 595–602.
- Norenberg, W. and Illes, P. (2000). Neuronal P2X receptors: localisation and functional properties. *Naunyn Schmiedebergs Arch. Pharmacol.* **362**, 324–339.
- Olah, M. E. and Stiles, G. L. (1992). Adenosine receptors. *Annu. Rev. Physiol.* **54**, 211–225.
- Oumi, T., Ukena, K., Matsushima, O., Ikeda, T., Fujita, T., Minakata, H. and Nomoto, K. (1994). Annetocin: an oxytocin-related peptide isolated from the earthworm, *Eisenia foetida*. *Biochem. Biophys. Res. Commun.* **198**, 393–399.
- Palmer, L. G., Sackin, H. and Frindt, G. (1998). Regulation of Na<sup>+</sup> channels by luminal Na<sup>+</sup> in rat cortical collecting tubule. *J. Physiol., Lond.* **509**, 151–162.
- Proux, J. P., Miller, C. A., Li, J. P., Carney, R. L., Girardie, A., Delaage, M. and Schooley, D. A. (1987). Identification of an arginine vasopressin-like diuretic hormone from *Locusta migratoria*. *Biochem. Biophys. Res. Commun.* **149**, 180–186.
- Prusch, R. D. and Otter, T. (1977). Annelid transepithelial ion transport. *Comp. Biochem. Physiol.* **57A**, 87–92.
- Ralevic, V. and Burnstock, G. (1998). Receptors for purines and pyrimidines. *Pharmacol. Rev.* **50**, 413–492.
- Riccardi, D. (2000). Calcium ions as extracellular, first messengers. *Z. Kardiol.* **89**, 9–14.
- Salzert, M., Bulet, P., Van Dorsselaer, A. and Malecha, J. (1993). Isolation, structural characterization and biological function of a lysine-conopressin in the central nervous system of the pharyngobdellid leech *Erpobdella octoculata*. *Eur. J. Biochem.* **217**, 897–903.
- Salzert, M., Bulet, P., Wattez, C., Verger-Bocquet, M. and Malecha, J. (1995). Structural characterization of a diuretic peptide from the central nervous system of the leech *Erpobdella octoculata*. Angiotensin II amide. *J. Biol. Chem.* **270**, 1575–1582.
- Satake, H., Takuwa, K., Minakata, H. and Matsushima, O. (1999). Evidence for conservation of the vasopressin/oxytocin superfamily in Annelida. *J. Biol. Chem.* **274**, 5605–5611.
- Schnizler, M. and Clauss, W. (1998). Characterization of a voltage-dependent conductance in the basolateral membrane of leech skin epithelium. *J. Comp. Physiol. B* **168**, 295–302.
- Schwiebert, E. M. (1999). ABC transporter-facilitated ATP conductive transport. *Am. J. Physiol.* **276**, C1–C8.
- Surprenant, A., Buell, G. and North, R. A. (1995). P2X receptors bring new structure to ligand-gated ion channels. *Trends Neurosci.* **18**, 224–229.
- Turnheim, K. (1991). Intrinsic regulation of apical sodium entry in epithelia. *Physiol. Rev.* **71**, 429–445.
- Vassilev, P. M., Peng, J. B., Hediger, M. A. and Brown, E. M. (2001). Single-channel activities of the human epithelial Ca<sup>2+</sup> transport proteins CaT1 and CaT2. *J. Membr. Biol.* **184**, 113–120.
- von Kugelgen, I. and Wetter, A. (2000). Molecular pharmacology of P2Y-receptors. *Naunyn Schmiedebergs Arch. Pharmacol.* **362**, 310–323.
- Weber, W. M., Blank, U. and Clauss, W. (1995). Regulation of electrogenic Na<sup>+</sup> transport across leech skin. *Am. J. Physiol.* **268**, R605–R613.
- Weber, W. M., Dannenmaier, B. and Clauss, W. (1993). Ion transport across leech integument. I. Electrogenic Na<sup>+</sup> transport and current fluctuation analysis of the apical Na<sup>+</sup> channel. *J. Comp. Physiol. B* **163**, 153–159.
- Yagil, Y. (1994). The effects of adenosine on water and sodium excretion. *J. Pharmacol. Exp. Ther.* **268**, 826–835.
- Zerbst-Boroffka, I. and Wenning, A. (1986). Mechanisms of regulatory salt and water excretion in the leech, *Hirudo medicinalis* L. *Zool. Beitr.* **30**, 359–377.
- Zerbst-Boroffka, I., Wenning, A. and Bazin, B. (1982). Primary urine formation during diuresis in the leech *Hirudo medicinalis*. *J. Comp. Physiol. B* **146**, 75–79.
